# Supplementary material
Source: publisher figshare collection journal article supplement (https://acs.figshare.com/ndownloader/files/4086580)
Supplement: Supplementary file 1 [file 4086580]

## Supporting Information

### **Three-Dimensional Homogeneous Ferrite-Carbon Aerogel: One Pot Fabrication and Enhanced Electro-Fenton Reactivity**

*Yujing Wang,<sup>a</sup> Guohua Zhao,<sup>\*,a,b</sup> Shouning Chai,<sup>a</sup> Hongying Zhao,<sup>a,b</sup>*

*and Yanbin Wang<sup>a</sup>*

<sup>a</sup> Department of Chemistry, Tongji University, 1239 Siping Road, Shanghai 200092,  
PR China

<sup>b</sup> State Key Laboratory of Pollution Control and Resource Reuse, Tongji University,  
1239 Siping Road, Shanghai 200092, PR China

Contents: One Text (Text S1) and seven figures (Figure S1-S7)

---

\* Corresponding author Phone: (86)-21-65988570. Fax: (86)-21-65982287.

E-mail: g.zhao@tongji.edu.cn

### Text S1.

For studying the catalytic performance to decompose  $\text{H}_2\text{O}_2$  of 5 wt% FCA, a series of heterogeneous Fenton oxidation with adding a dose of  $\text{H}_2\text{O}_2$  (5 mM) are performed, including the changes of accumulated  $\cdot\text{OH}$  concentration and metalaxyl TOC removal with reaction time in a Fenton system (no potential is applied). As shown in Figure S3, when the  $\text{H}_2\text{O}_2$  solution is added to FCA, the strong catalytic ability to  $\text{H}_2\text{O}_2$  decomposition is showed. The accumulated concentration of  $\cdot\text{OH}$  reaches to 76  $\mu\text{M}$  after 240 min, and the corresponding of metalaxyl TOC removal is 58% (Figure S4). Although the FCA shows good Fenton catalytic activity to degrade metalaxyl, the TOC removal is obviously lower than E-Fenton process (98%). The reason is the  $\cdot\text{OH}$  is only produce from FCA cathode in heterogeneous Fenton, while both FCA cathode and BDD anode are contributed together to the  $\cdot\text{OH}$  generation in Electro-Fenton system.

Furthermore, steady-state  $\text{H}_2\text{O}_2$  concentration with 5 wt% FCA is also determined. From Figure S5, concentration of  $\text{H}_2\text{O}_2$  electro-generated on the pure CA cathode increases to 35  $\text{mg L}^{-1}$  after 240 min, indicating the CA is a proper electrode for Electro-Fenton reaction, while the corresponding value on the 5 wt% FCA is only about 6  $\text{mg L}^{-1}$ . It is attributed that the electrogenerated  $\text{H}_2\text{O}_2$  could be in situ catalytically decomposed to  $\cdot\text{OH}$  promptly, and the accumulation of  $\text{H}_2\text{O}_2$  is difficult on the FCA cathode.

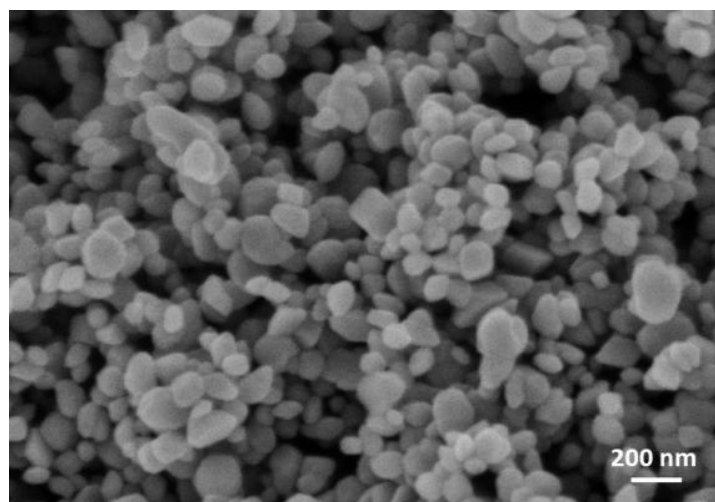

Figure S1. SEM images of fresh Fe@Fe<sub>2</sub>O<sub>3</sub>/CA electrodes

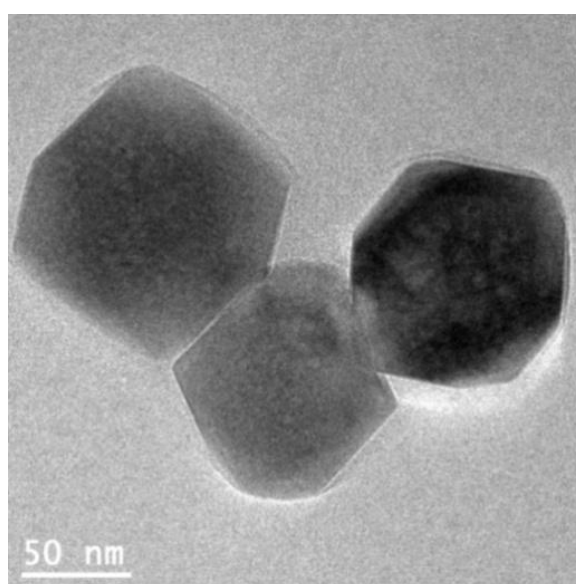

Figure S2. TEM images of fresh Fe@Fe<sub>2</sub>O<sub>3</sub> nanoparticle on the Fe@Fe<sub>2</sub>O<sub>3</sub>/CA

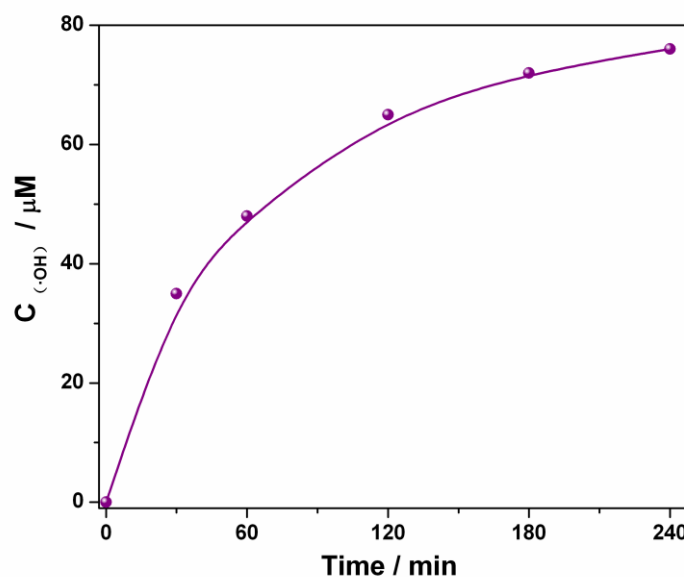

Figure S3. Changes of accumulated  $\cdot\text{OH}$  concentration with reaction time  
(placing 5 wt% FCA in 5 mM  $\text{H}_2\text{O}_2$  solution, pH = 6.0)

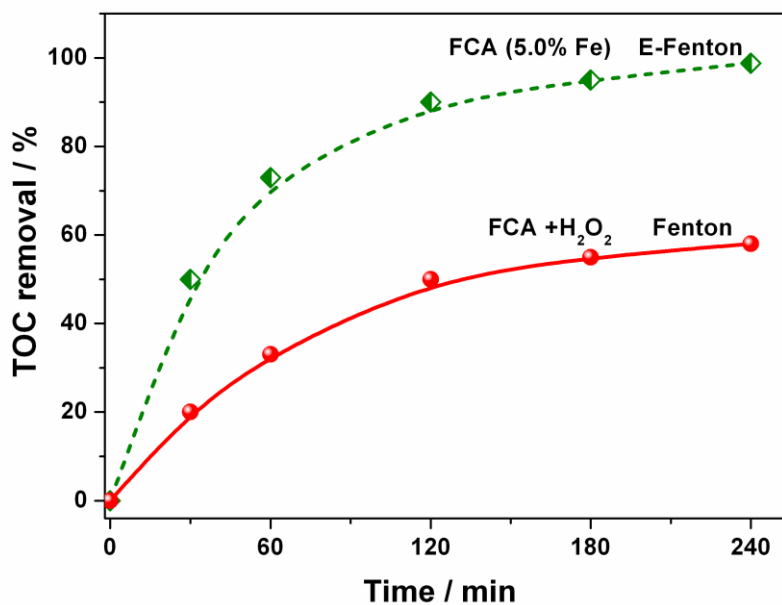

Figure S4. Changes of metalaxyl TOC removal with reaction time using different treatment (pH = 6.0, applied current  $10 \text{ mA cm}^{-2}$ ,  $0.1 \text{ M Na}_2\text{SO}_4$  in Electro-Fenton system; pH = 6.0, 5 mM  $\text{H}_2\text{O}_2$  in Fenton system)

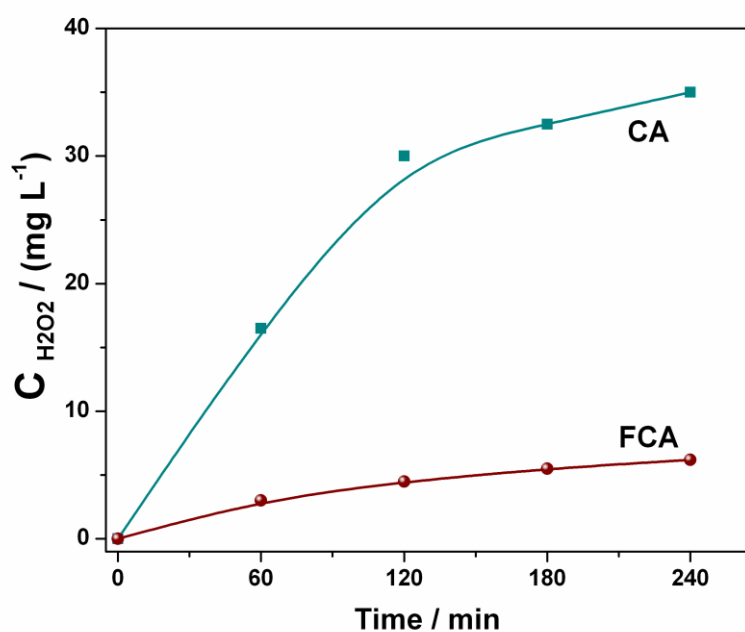

Figure S5. Steady-state concentration of H<sub>2</sub>O<sub>2</sub> electrogenerated on 5 wt% FCA

(pH = 6.0, applied current 10 mA cm<sup>-2</sup>, 0.1 M Na<sub>2</sub>SO<sub>4</sub>)

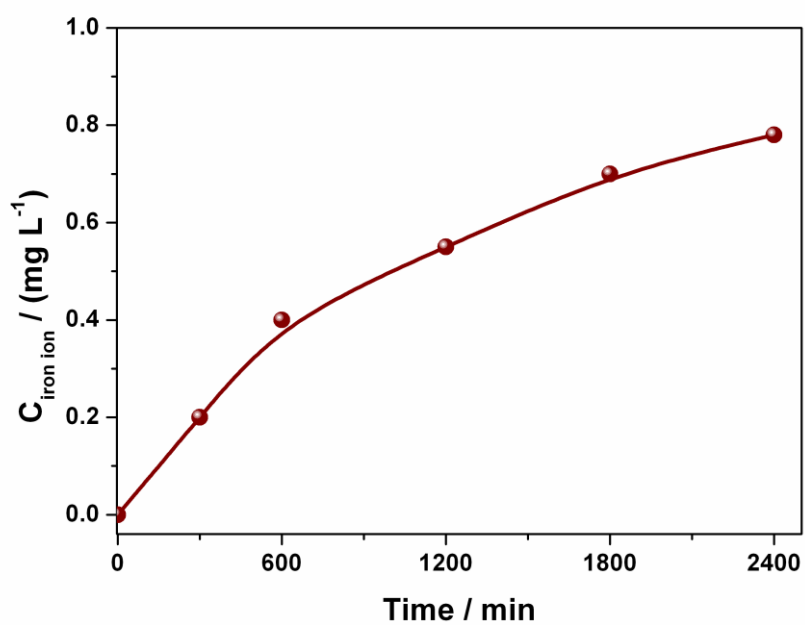

Figure S6. Concentration of leached Fe<sup>3+</sup> with time

(immersing 5 wt% FCA in the diluted HCl solution, pH = 3.0)

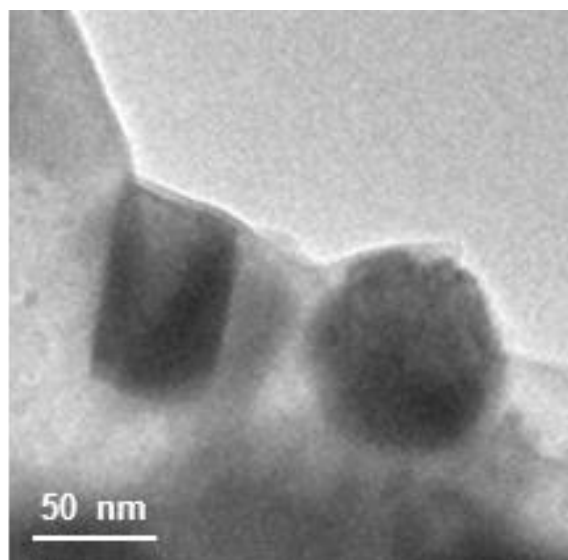

Figure S7. TEM image of 5 wt% FCA with immersing in the diluted HCl solution  
(pH = 3.0, 2400 min)
